# Supplementary material for: Domain state exchange bias in a single layer FeRh thin film formed via low energy ion implantation
Source: Royal Society of Chemistry journal article supplement (doi:10.1039/d2tc04014j), 2022-12-16
Supplement: d2tc04014j1.pdf [file d2tc04014j1.pdf]

Supplemental Data for:

“Domain State Exchange Bias in a Single Layer FeRh Thin Film Formed via Low Energy Ion Implantation”

Cory D. Cress<sup>1</sup>, Olaf van 't Erve<sup>2</sup>, Joseph Prestigiacomo<sup>2</sup>, Samuel W. LaGasse<sup>1</sup>, Artur Glavic<sup>3</sup>, Valeria Lauter<sup>4</sup>, Steven P. Bennett<sup>2</sup>

<sup>1</sup> U.S. Naval Research Laboratory, Materials Science and Technology Division, Washington DC U.S.A

<sup>2</sup> U.S. Naval Research Laboratory, Electronics Science and Technology Division. Washington DC U.S.A

<sup>3</sup> Laboratory for Neutron and Muon Instrumentation, Paul Scherrer Institut, 5232 Villigen PSI, Switzerland

<sup>4</sup> Oak Ridge National Laboratory, Neutron Sciences Directorate, Oak Ridge TN U.S.A

---

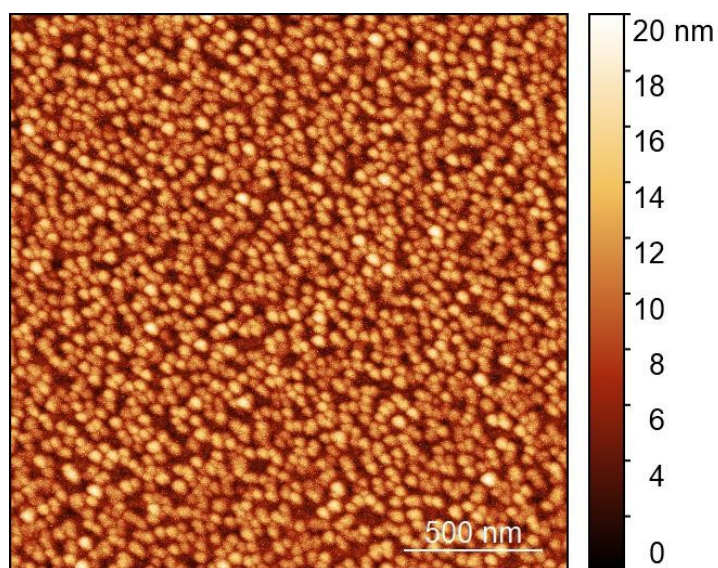

Figure S1: AFM image of FeRh film surface after 1keV Fe<sup>+</sup> Ion irradiation
